# Supplementary material for: Induction of BVR-A Expression by Korean Red Ginseng in Murine Hippocampal Astrocytes: Role of Bilirubin in Mitochondrial Function via the LKB1–SIRT1–ERRα Axis
Source: MDPI journal article supplement (doi:10.3390/antiox11091742), 2022-09-01
Supplement: s1 [file s1]

Supplementary Figure S1

**a**

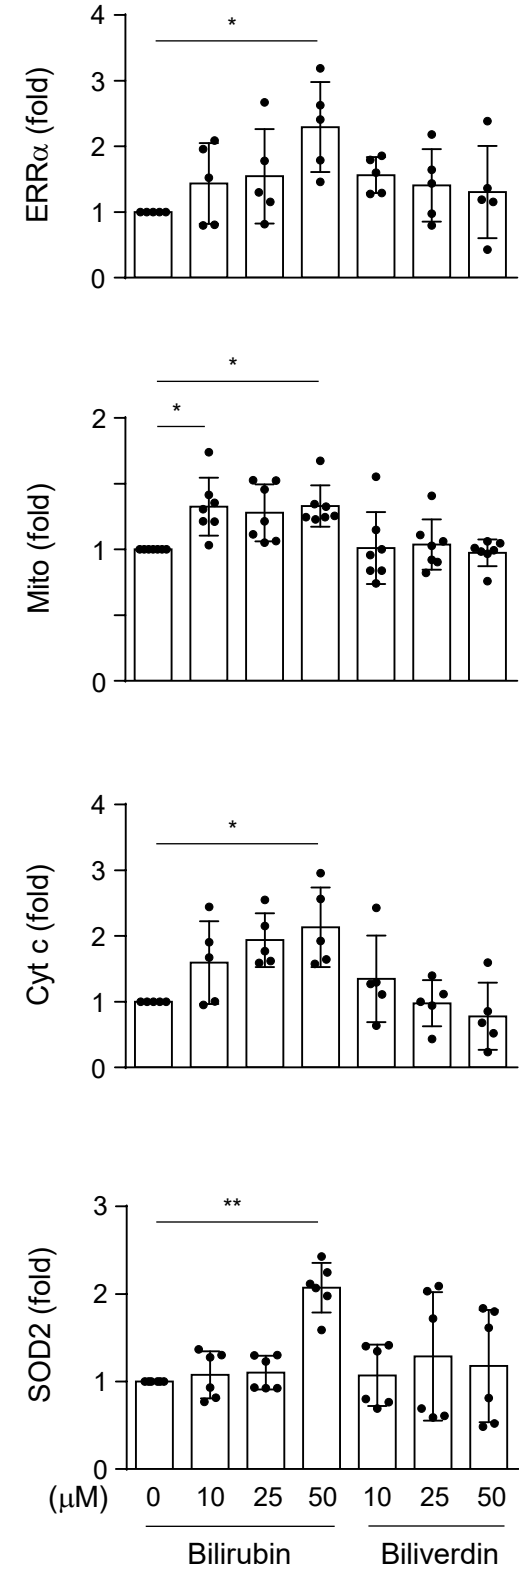

**b**

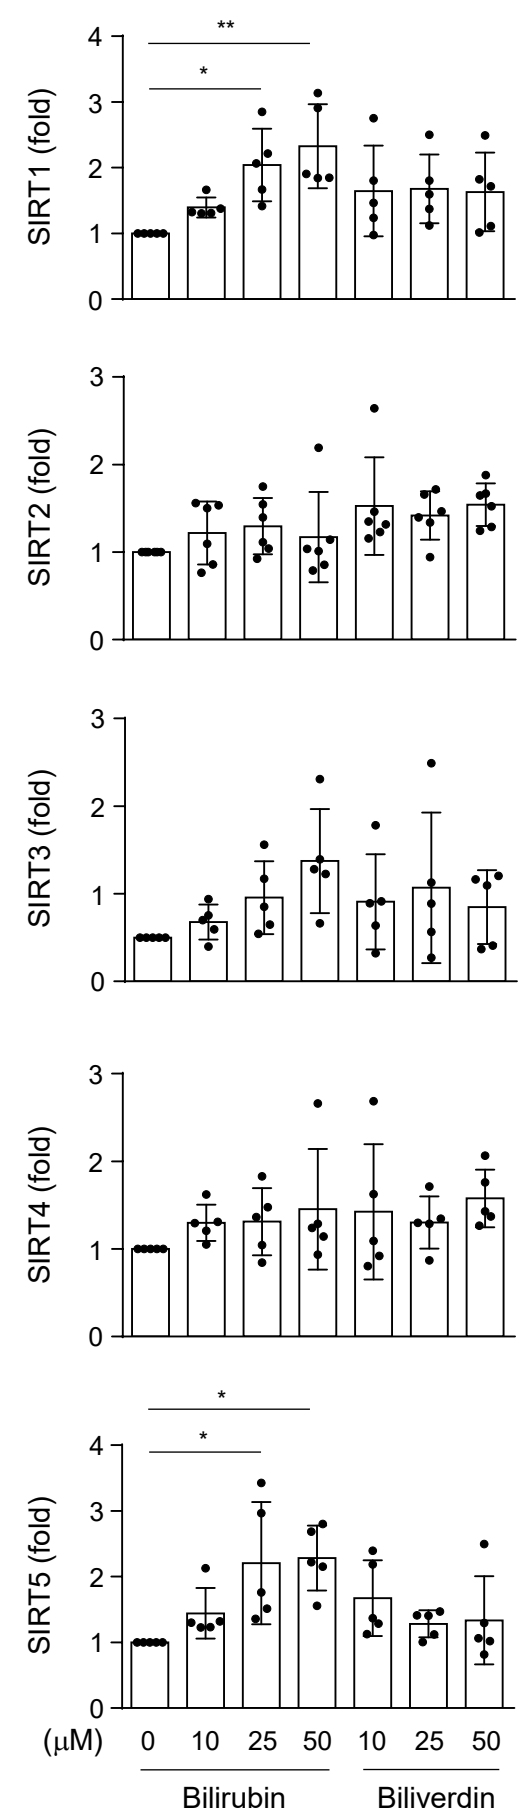

**Supplementary Figure S1. (a-b)** Astrocytes were treated with 50  $\mu\text{M}$  bilirubin or 50  $\mu\text{M}$  biliverdin for 4 h and bands from western blot were analyzed (( $n = 5-7$ ). \* $P < 0.05$ ; \*\* $P < 0.01$ ).

# Supplementary Figure S2

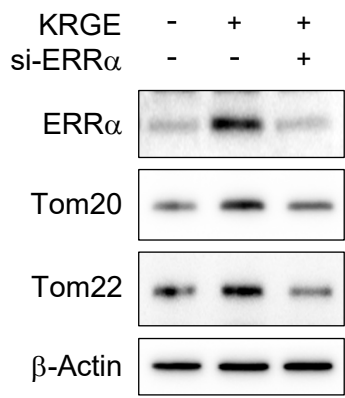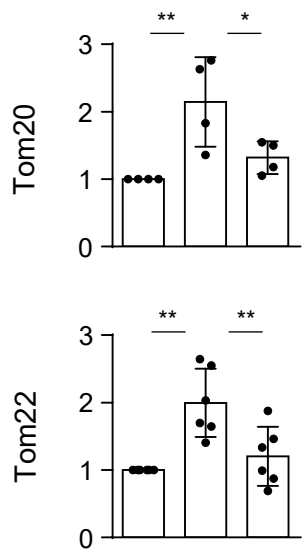

**Supplementary Figure S2.**  
Astrocytes were transfected with ERR $\alpha$  siRNA, then treated with KRGE for 24 h. Bands from western blot analysis were quantified ( $n = 4$  or 6). \* $P < 0.05$ ; \*\* $P < 0.01$ .
